# Supplementary material for: Ensembles of Hydrophobicity Scales as Potent Classifiers for Chimeric Virus-Like Particle Solubility – An Amino Acid Sequence-Based Machine Learning Approach
Source: Front Bioeng Biotechnol. 2020 May 5;8:395. doi: 10.3389/fbioe.2020.00395 (PMC7217080; doi:10.3389/fbioe.2020.00395)
Supplement: Supplementary file 2 [file Table_1.XLSX]

## Sheet: Sheet1
Binary solubility Data Table: Binary solubility indicating soluble (1) and insoluble (0) observations, shown in a grid of insertion strategies (A-H) over inserts (1-71).
	Insertion strategy	A	B	C	D	E	F	G	H
Insert	1	0	1	1	1	1	0	1	0
	2	0	0	0	0	0	0	0	0
	3	0	0	0	0	0	0	0	0
	4	0	0	0	0	0	0	0	0
	5	0	0	0	0	0	0	0	0
	6	0	0	0	0	0	0	0	0
	7	0	0	0	0	0	0	0	0
	8	0	0	0	0	0	0	0	0
	9	0	0	0	0	0	0	0	0
	10	0	0	0	0	0	0	0	0
	11	0	0	0	0	0	0	0	0
	12	0	0	0	1	1	0	1	0
	13	0	0	0	1	1	0	1	0
	14	1	0	0	1	1	0	1	0
	15	1	0	1	1	1	1	1	1
	16	0	0	0	0	0	0	0	0
	17	0	0	0	0	0	0	0	0
	18	0	0	0	0	0	0	0	0
	19	0	0	0	0	0	0	0	0
	20	0	0	0	0	0	0	0	0
	21	0	0	0	0	0	0	0	0
	22	0	0	0	0	0	0	0	0
	23	0	0	0	0	0	0	0	0
	24	0	0	0	0	0	0	0	0
	25	1	1	1	1	1	1	1	1
	26	1	1	1	1	1	1	1	1
	27	1	1	1	1	1	1	1	1
	28	1	1	1	1	1	1	1	1
	29	0	0	0	0	0	0	0	0
	30	1	1	1	1	1	1	1	1
	31	0	0	0	0	0	0	0	0
	32	1	1	1	1	1	1	1	1
	33	0	0	0	0	0	0	0	0
	34	0	0	0	1	0	0	1	0
	35	0	0	0	0	0	0	0	0
	36	1	1	1	1	1	1	1	1
	37	1	1	1	1	1	1	1	1
	38	1	1	1	1	1	1	1	1
	39	1	1	1	0	1	1	1	1
	40	1	1	1	1	1	1	1	1
	41	0	0	0	1	0	0	0	0
	42	0	0	0	1	1	0	1	0
	43	0	0	0	1	0	0	0	0
	44	0	0	0	1	0	0	0	0
	45	0	0	1	1	1	1	1	0
	46	1	0	0	1	1	0	1	0
	47	0	0	0	0	0	0	0	0
	48	0	0	0	0	0	0	0	0
	49	1	1	1	1	1	0	1	0
	50	1	1	1	1	1	1	1	1
	51	0	0	0	1	1	1	1	0
	52	1	1	1	1	1	1	1	1
	53	1	1	1	1	1	1	1	1
	54	1	1	1	1	1	1	1	1
	55	1	1	1	1	1	1	1	1
	56	1	1	1	1	1	1	1	1
	57	1	1	0	0	1	0	1	1
	58	1	1	1	1	1	1	1	1
	59	1	1	1	1	1	0	1	0
	60	1	1	1	1	1	0	1	0
	61	1	1	1	1	1	1	1	1
	62	1	1	1	1	1	0	1	0
	63	1	1	1	1	1	1	1	1
	64	1	0	1	0	1	0	1	0
	65	1	1	1	1	1	1	1	1
	66	0	0	0	1	1	0	1	0
	67	1	1	1	1	1	1	1	1
	68	1	1	1	1	1	0	1	0
	69	1	1	1	1	1	0	1	1
	70	1	1	1	1	1	1	1	1
	71	1	1	1	1	1	1	1	1

## Sheet: Sheet2
	'A41'	'A42'	'A43'	'A44'	'A46'	'A47'	'A48'	'A49'	'A50'	'A51'	'A52'	'A54'	'A55'	'A56'	'A57'	'A58'	'A59'	'A60'	'A61'	'A62'	'A63'	'A64'	'A65'	'A66'	'A67'	'A68'	'A69'	'A70'	'A71'	'A72'	'A73'	'A74'	'A75'	'A76'	'A77'	'A78'	'A79'	'A80'	'A81'	'A82'	'A84'	'A85'	'A86'	'A87'	'A88'	'A89'	'A90'	'A91'	'A92'
	0	0	0	0	0	0	0	0	0	0	0	0	0	1	1	0	0	0	0	0	0	0	0	0	1	1	1	1	0	1	0	1	0	0	0	1	1	1	1	1	0	0	0	0	0	1	0	0	1
[truncated: 519 more columns]
